# Supplementary material for: Microphysical view of development and ice production of mid-latitude stratocumulus during an extratropical cyclone
Source: Copernicus journal article supplement (doi:10.5194/egusphere-2024-314), 2024-02-28
Supplement: Supplementary file 1 [file egusphere-2024-314-supplement.pdf]

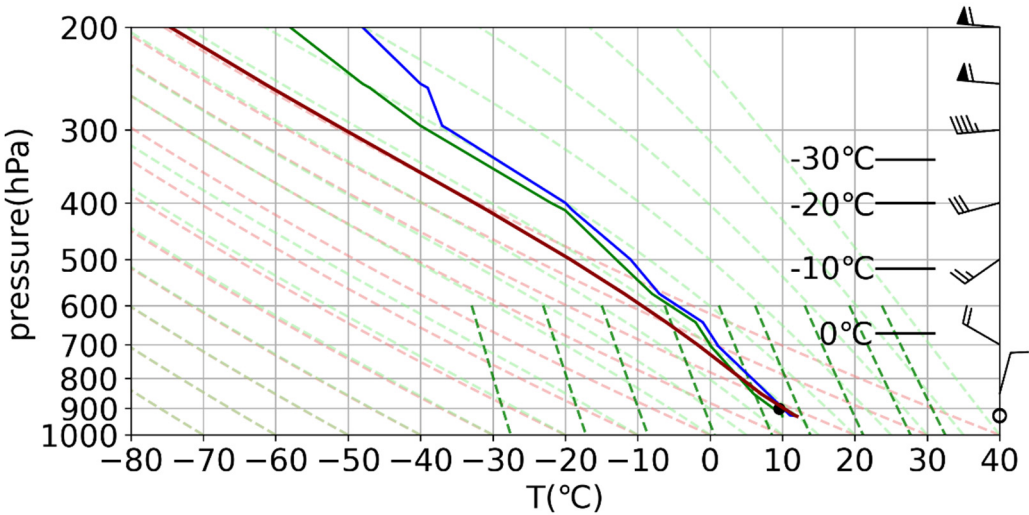

Figure S1: Radiosonde at 08:00 (BJT) on September 26<sup>th</sup>, 2017.

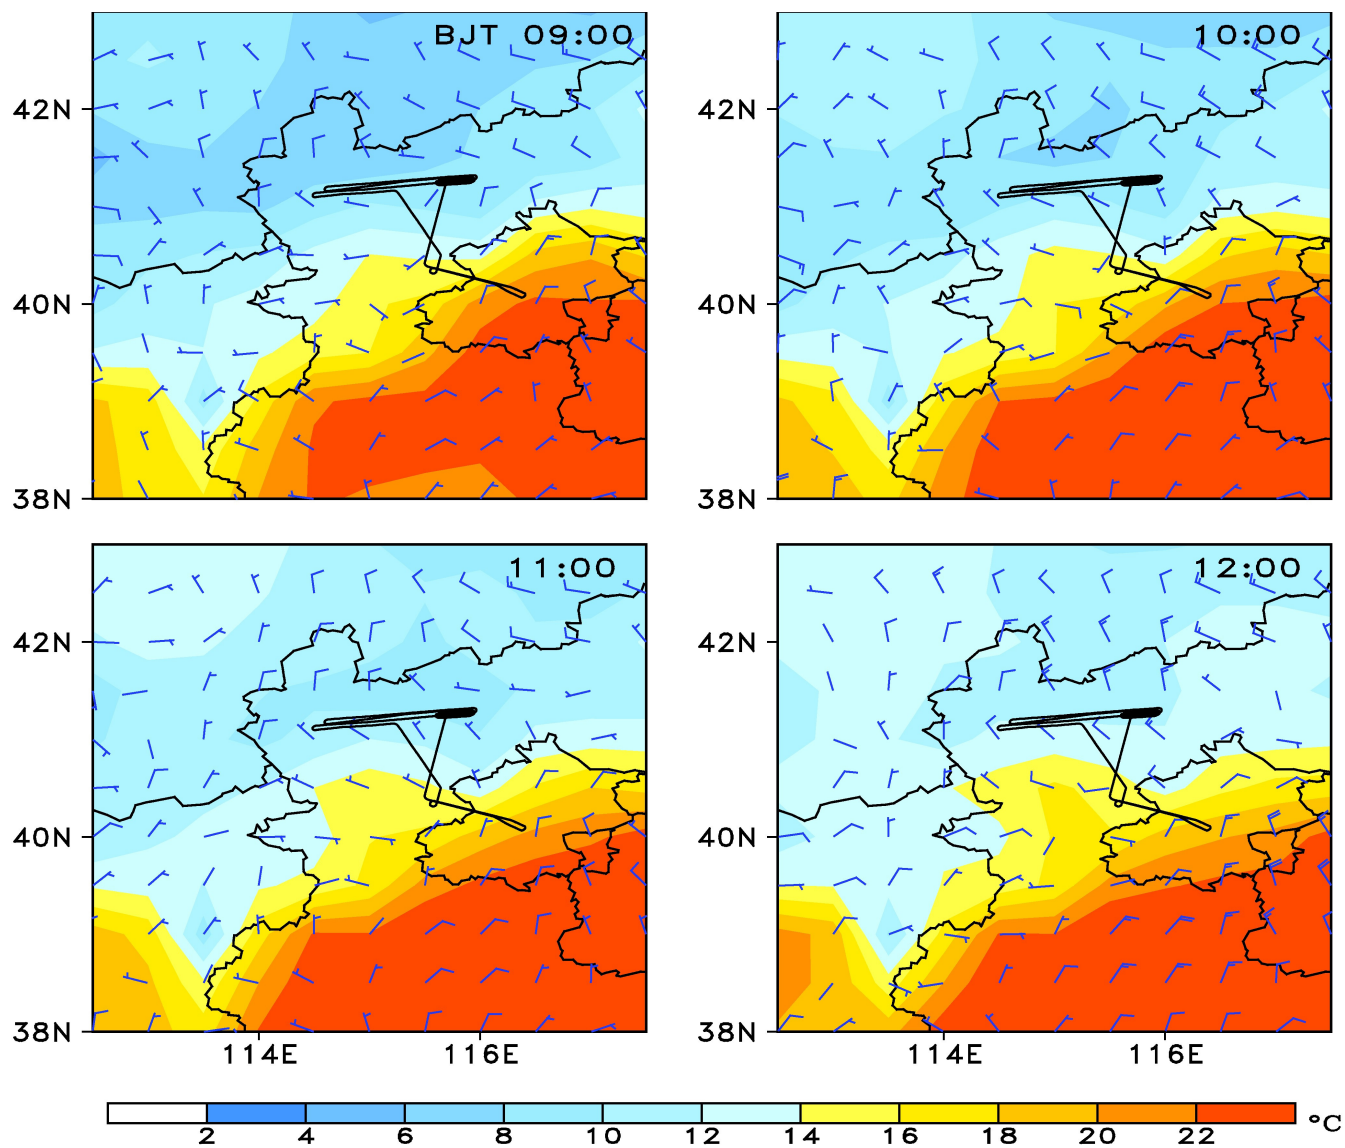

**Figure S2: Flight tracks (black line) mapping on the wind field (blue wind shaft) and temperature field (color) observed by ground weather observation station at 09:00-12:00 (BJT) on September 26<sup>th</sup>, 2017.**

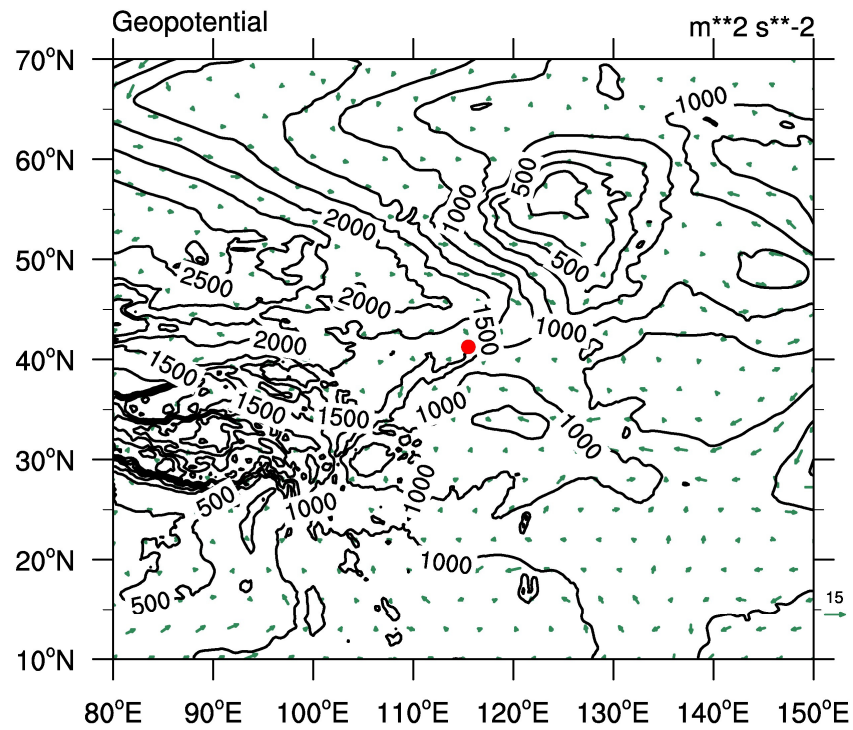

Figure S3: Geopotential height contour map at 1000 hPa at 09:00 (BJT) on September 26<sup>th</sup>, 2017. The experimental region is indicated by the red dot.

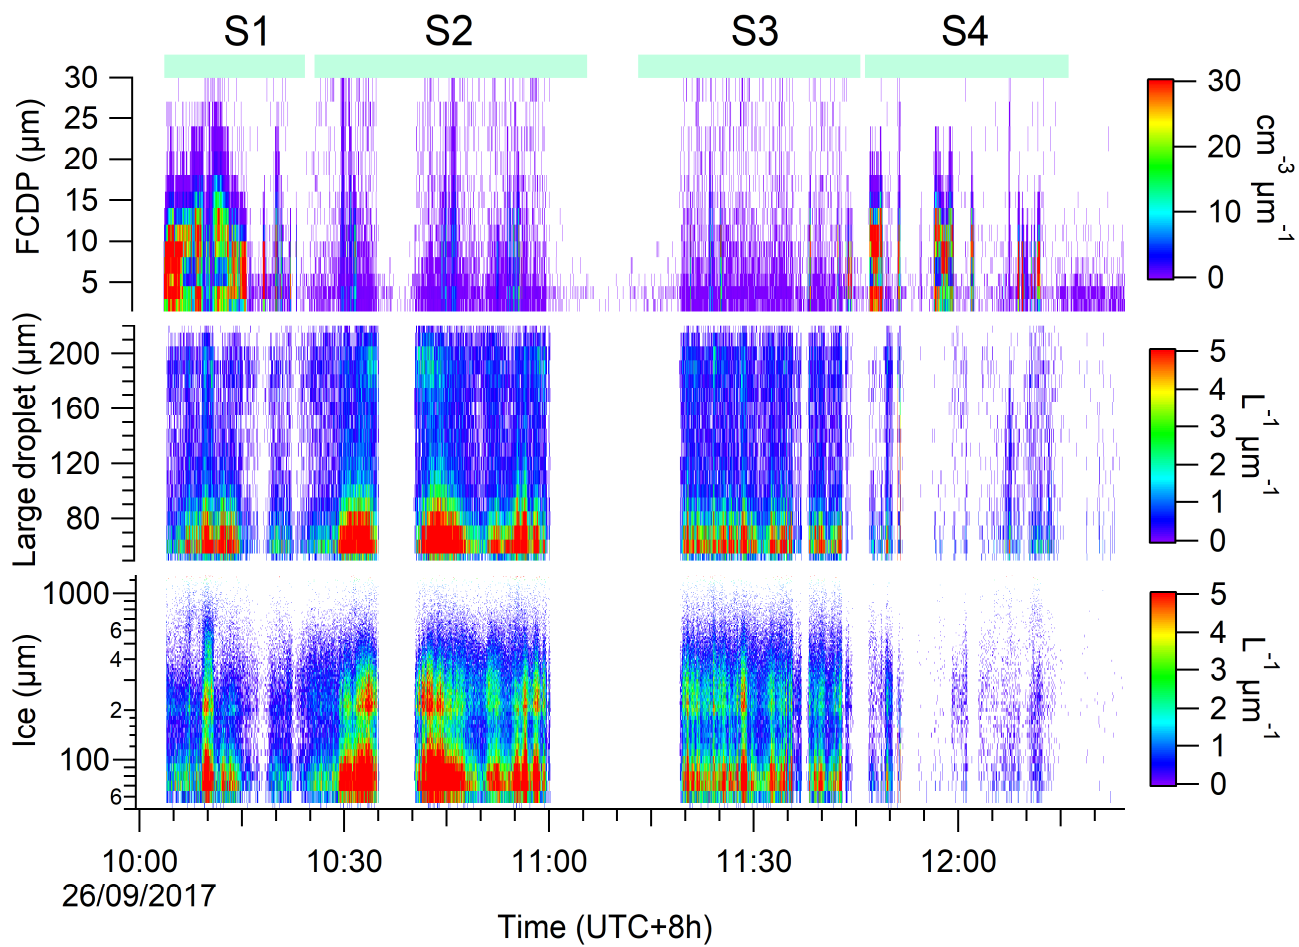

**Figure S4: Particle size distribution spectrum of FCDP and 2D-S (ice and large droplet).**

40

45

50

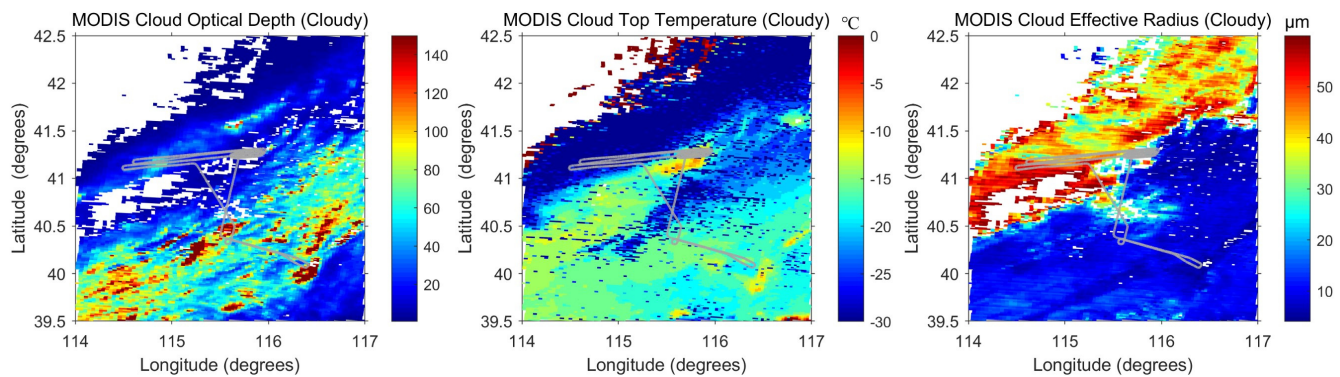

**Figure S5: Cloud optical depth, cloud-top temperature and cloud effective radius from MODIS at 10:30 (UTC+8h) on September 26<sup>th</sup>, 2017, with flight track shown in grey line.**

55

60

65

70

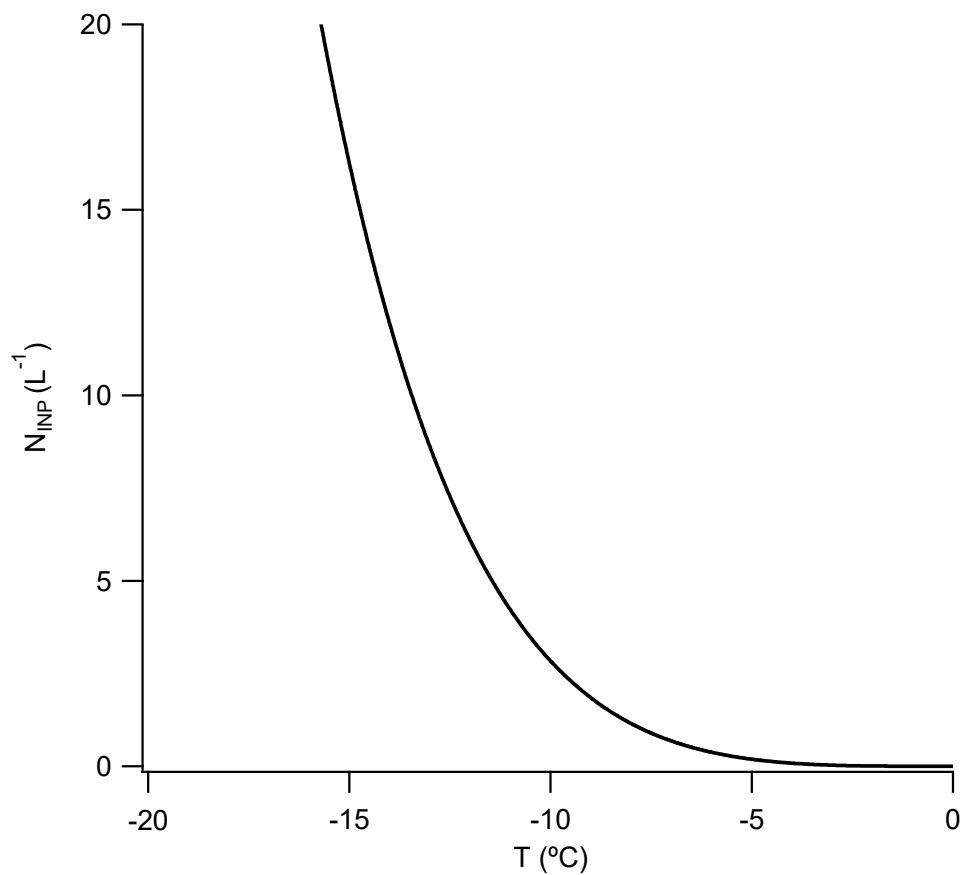

**Figure S6:** The number concentration of ice nucleating particles ( $N_{\text{INP}}$ ) as a function of cloud temperature, taking into account a 10-fold error.

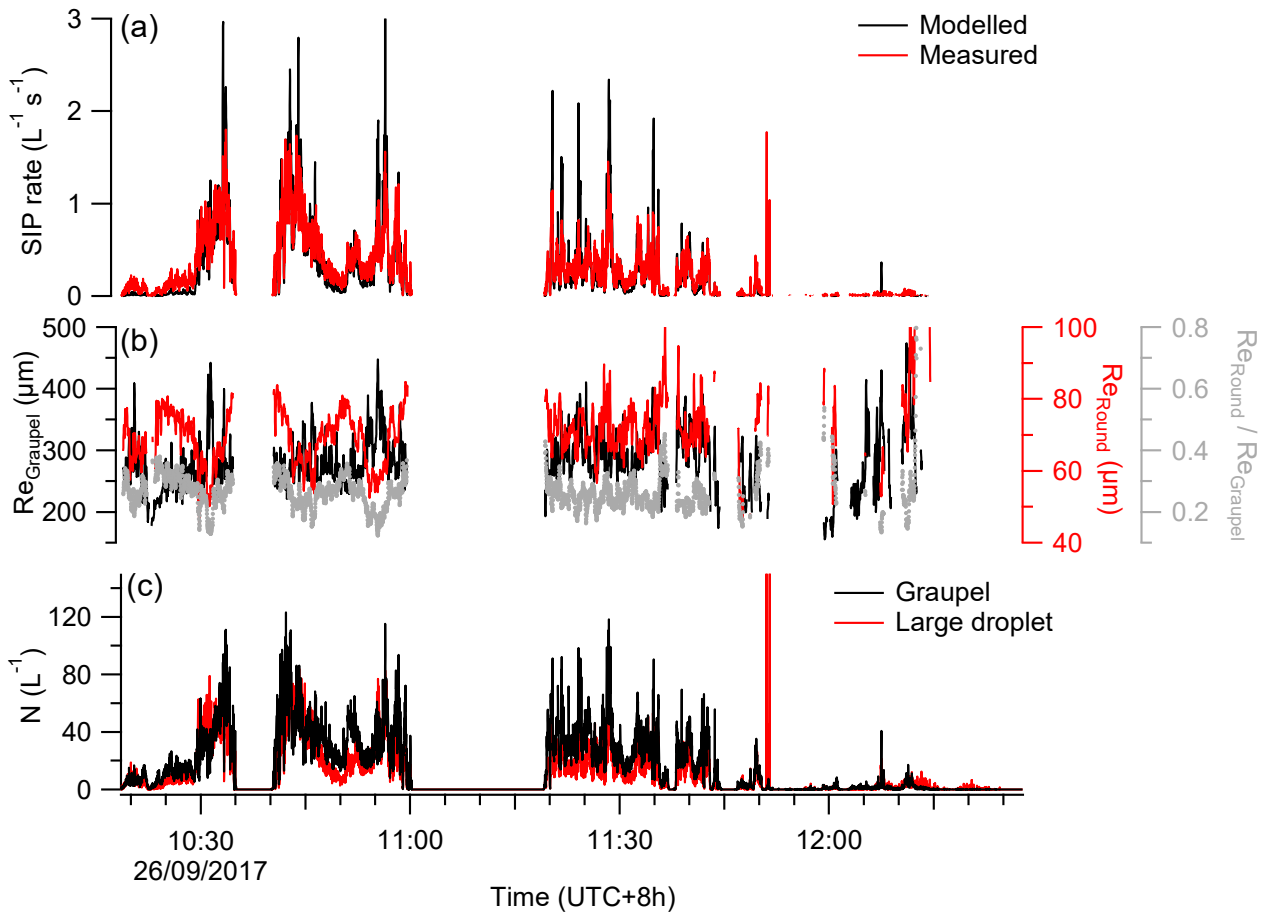

**Figure S7: Time series of modelled and measured secondary ice production (SIP) rate. (a) The modelled and measured SIP rate, (b) Effective radius of graupel ( $Re_{Graupel}$ ) and large droplet ( $Re_{Round}$ ), and the ratio between its ( $Re_{Round} / Re_{Graupel}$ ), (c) Number concentrations ( $N$ ) of graupel and large droplet.**

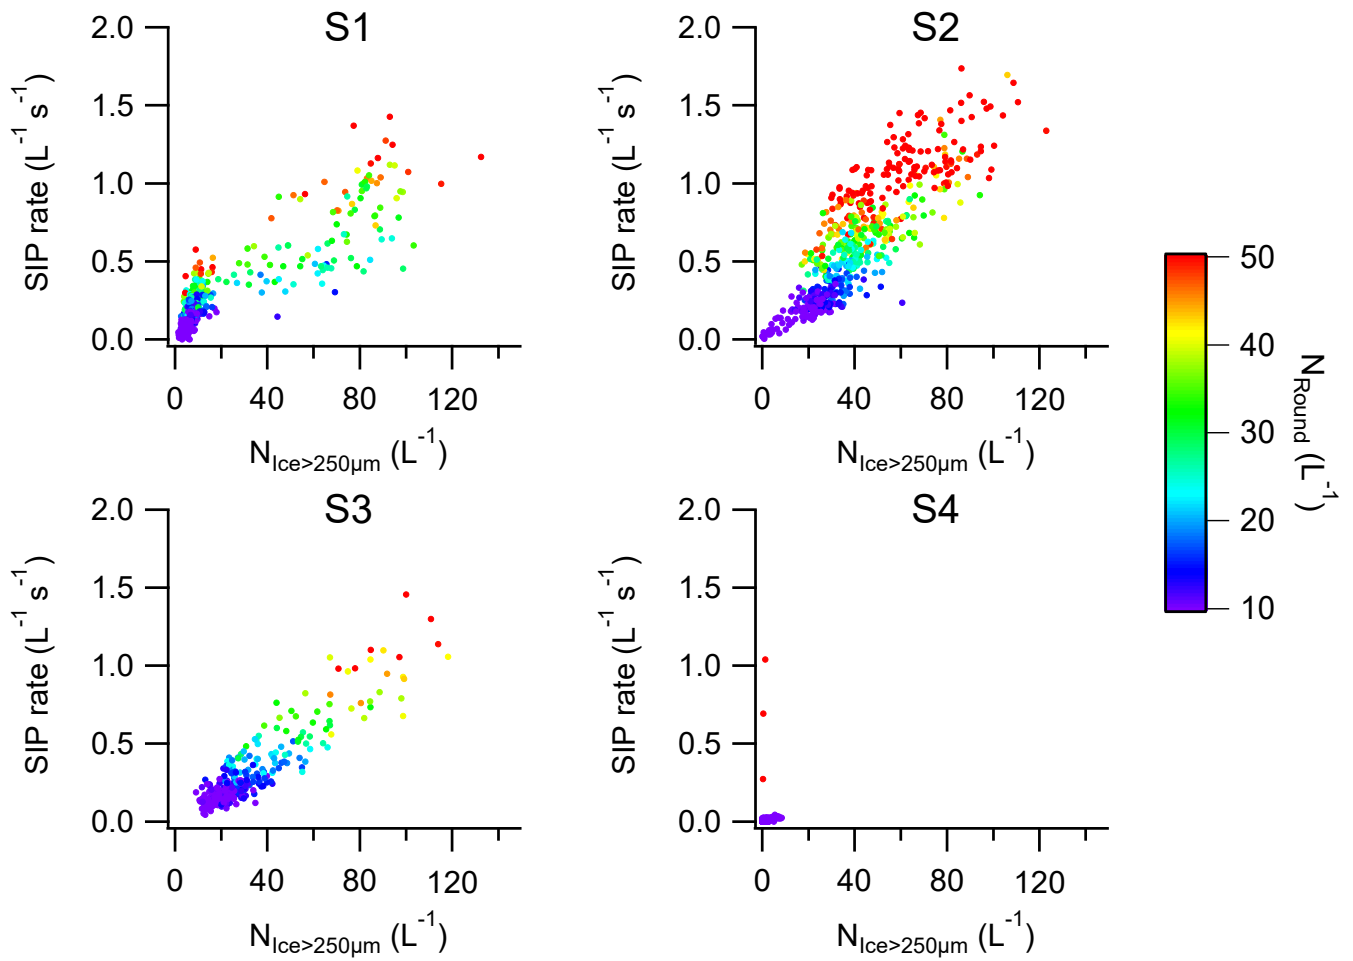

80 **Figure S8: The number concentration of ice with diameter  $> 250 \mu\text{m}$  ( $N_{\text{ice}>250\mu\text{m}}$ ) as a function of the measured SIP rate at different stages, colored by  $N_{\text{Round}}$ .**
